# Supplementary material for: Isomeric thiophene-fused benzocarborane molecules—different lithium doping effect on the nonlinear optical property
Source: Royal Society of Chemistry journal article supplement (doi:10.1039/c3dt52923a), 2013-11-11
Supplement: c3dt52923a.pdf [file c3dt52923a.pdf]

## Supporting Information

### Isomeric Thiophene-fused Benzocarborane Molecules — Different Lithium Doping Effect on the Nonlinear Optical Property

Yong Li, Hong-Liang Xu, Heng-Qing Wu, Rong-Lin Zhong, Shi-Ling Sun\*, Zhong-Min Su\*

Institute of Functional Material Chemistry, Faculty of Chemistry, Northeast Normal University,

Changchun 130024, Jilin, People's Republic of China

E-mail: [sunsl430@nenu.edu.cn](mailto:sunsl430@nenu.edu.cn), [zmsu@nenu.edu.cn](mailto:zmsu@nenu.edu.cn)

Table S1. The  $\beta_{\text{tot}}$  value of Tb1-Li calculated by different methods with 6-31+G\* basis set.

| Tb1-Li                    | Mp2   | CAM-B3LYP | BhandHLYP |
|---------------------------|-------|-----------|-----------|
| $\beta_x$ (au)            | -1777 | 349       | 7         |
| $\beta_y$ (au)            | -5505 | -1188     | -2799     |
| $\beta_z$ (au)            | 3739  | 1536      | 5557      |
| $\beta_{\text{tot}}$ (au) | 6888  | 1973      | 6222      |

Table S2. The  $\beta_{\text{tot}}$  value of Tb1-Li is calculated by different basis set with BhandHLYP method.

| Tb1-Li                    | 6-31G* | 6-31+G* | 6-311+G* |
|---------------------------|--------|---------|----------|
| $\beta_x$ (au)            | 352    | 7       | 6        |
| $\beta_y$ (au)            | -1227  | -2799   | -2571    |
| $\beta_z$ (au)            | 2825   | 5557    | 5110     |
| $\beta_{\text{tot}}$ (au) | 3101   | 6222    | 5720     |
